# Supplementary material for: A Systematic Review of the Potential Implication of Infectious Agents in Myasthenia Gravis
Source: Front Neurol. 2021 Jun 14;12:618021. doi: 10.3389/fneur.2021.618021 (PMC8236805; doi:10.3389/fneur.2021.618021)
Supplement: Supplementary file 2 [file Table_2.XLSX]

## Sheet: Data Collection
First author, year, journal	Type of study	Agent	Q score	Infection (Yes/No)	Comorbidity workup	Causality established?	Causality explanatory notes (if applicable)	Hum/Can/Fel/Rod	MG diagnosis	n MG cases positive for infectious disease	IME
Cavalcante, P. 2010, Neurology	Prospective Case-Control Study	Poliovirus	30	Yes	Direct organism detection (culture, cytology, PCR)	Suggestive	Suggestion of a viral contribution to the intrathymic alterations leading to MG	Human	Supportive	4	4.29167
Cavalcante, P. 2010, Annals of Neurology	Prospective Case-Control Study	Epstein-Barr Virus	26	Yes	Direct organism detection (culture, cytology, PCR)	Suggestive	Suggestion of a viral contribution to the intrathymic alterations leading to MG	Human	Diagnostic	14 (**only includes MG patients positive for anti-AChR antibodies and the pathogen)	4.875
Hung, W-L. 2011, Clinical Neurology and Neuroscience	Restrospective Case Report	Human Immunodeficiency Virus	26	Yes	Direct organism detection (culture, cytology, PCR)	No/Absent/Unclear/NA		Human	Diagnostic	1	2.70833
Tackenberg, B. 2009, Journal of Neuroimmunology	Prospective Case-Control Study	Cytomegalovirus	34	Yes	Serological detection of exposure	No/Absent/Unclear/NA		Human	Diagnostic	19	4.20833
Tomschik M, 2019, Emerging Infectious Diseases	Restrospective Case Report	Leptospira interrogans	23	Yes	Serological detection of exposure	Supportive	Demonstrated clinical improvement following treatment of infection	Human	Supportive	1	3.3125
Leis, A.A. 2014, Muscle & Nerve	Retrospective Case Series	West Nile Virus	31	Yes	Serological detection of exposure	Suggestive		Human	Diagnostic	6	3.47917
Molko, N. 2017, Neurology	Restrospective Case Series	Zika Virus	22	Yes	Direct organism detection (culture, cytology, PCR)	No/Absent/Unclear/NA		Human	Diagnostic	2	2.79167
Sherpa, M. 2017, The American Journal of Case Reports	Retrospective Case Report	Human Immunodeficiency Virus	24	Yes	Direct organism detection (culture, cytology, PCR)	No/Absent/Unclear/NA		Human	Diagnostic	1	2.66667
Cavalcante, P, 2011, Autoimmune Diseases	Prospective Case-Control Study	Epstein-Barr Virus	36	Yes	Direct organism detection (culture, cytology, PCR)	Suggestive	Suggestion of a viral contribution to intrathymic chronic inflammation leading to MG	Human	Diagnostic	10 (**only includes MG patients positive for anti-AChR antibodies and EBV DNA)	4.91667
Greco, M. 2016, Journal of Clinical Medicine Research	Cross-Sectional Study	West Nile Virus	26	Yes	Serological detection of exposure	Suggestive	Epidemiological data	Human	Diagnostic	5	3.54167
Christopoulos, P. 2015, Journal of Immunology	Prospective Case-Control Study	Leishmania infantum	26	Yes	Direct organism detection (culture, cytology, PCR)	No/Absent/Unclear/NA		Human	Diagnostic	1	3.70833
Saha, A. 2007, Singapore Medical Journal	Restrospective Case Report	Varicella-Zoster Virus	26	Yes	All other signs of infection	No/Absent/Unclear/NA	Demonstrated clinical improvement following recovery of infection	Human	Supportive	1	1.70833
Halfon, P. 1996, Journal of Viral Hepatitis	Cross-Sectional Study	Hepatitis C Virus	26	Yes	Direct organism detection (culture, cytology, PCR)	No/Absent/Unclear/NA	Argues against hepatitis C virus as a cause of MG	Human	Diagnostic	3	-3.20833
Belbezier, A. 2014, Emerging Infectious Diseases	Retrospective Case Report	Hepatitis E Virus	19	Yes	Direct organism detection (culture, cytology, PCR)	No/Absent/Unclear/NA	Demonstrated clinical improvement following recovery of infection	Human	Diagnostic	1	2.5625
Eddy, S. 1999, Digestive Diseases and Sciences	Retrospective case report	Hepatitis C Virus	23	Yes	Direct organism detection (culture, cytology, PCR)	No/Absent/Unclear/NA		Human	Diagnostic	1	2.64583
Kakalacheva, K. 2011, Annals of Neurology	Prospective Case-Control Study	Epstein-Barr Virus	26	Yes	Direct organism detection (culture, cytology, PCR)	No/Absent/Unclear/NA	Argues against Epstein Barr virus as a cause of MG	Human	Diagnostic	4	-3.54167
Rennspiess, D. 2015, Journal of Thoracic Oncology	Prospective Case-Control Study	Human Polyomavirus 7	22	Yes	Direct organism detection (culture, cytology, PCR)	No/Absent/Unclear/NA	Addreses human polyomavirus 7 as a cause for thymoma	Human	Diagnostic	10	3.95833
Felice, K.J. 2005, Journal of Child Neurology	Retrospective case report	Varicella-Zoster Virus	24	Yes	All other signs of infection	Supportive		Human	Supportive	1	3
Fukui, T. 1994, European Neurology	Retrospective case report	Human T Lymphotropic Virus Type I (HTLV-1 Associated Myelopathy)	26	Yes	Serological detection of exposure	No/Absent/Unclear/NA		Human	Diagnostic	1	2.375
Authier, F.J. 1995, Muscle & Nerve	Retrospective case report	Human Immunodeficiency Virus	19	Yes	Serological detection of exposure	No/Absent/Unclear/NA	Patient experienced relapse of myasthenic symptoms despite consistent antiretroviral therapy	Human	Supportive	1	1.89583
Lalive, P.H. 2007, Muscle & Nerve	Retrospective case report	Human Immunodeficiency Virus	26	Yes	Direct organism detection (culture, cytology, PCR)	No/Absent/Unclear/NA		Human	Diagnostic	1	2.70833
Mori, M. 2006, Journal of Neurological Sciences	Retrospective case report	Cytomegalovirus	26	Yes	Serological detection of exposure	No/Absent/Unclear/NA		Human	Diagnostic	1	2.375
Korn, I.L. 1981, European Neurology	Retrospective case report	Measles virus (case 3)	23	Yes	All other signs of infection	No/Absent/Unclear/NA	The study describes multiple cases of post-infection MG: each case describes a different pathogen. Demonstrated clinical improvement following recovery of infection	Human	Diagnostic	1	1.97917
Korn, I.L. 1981, European Neurology	Retrospective case report	Varicella-Zoster Virus (case 4)	19	Yes	All other signs of infection	No/Absent/Unclear/NA	The study describes multiple cases of post-infection MG: each case describes a different pathogen	Human	Diagnostic	1	1.89583
Barzago, C. 2016, Immunobiology	Prospective Case-Control Study	Hepatitis C virus	34	Yes	All other signs of infection	Suggestive		Human	Diagnostic	1	3.875
Barzago, C. 2016, Immunobiology	Prospective Case-Control Study	H1N1 influenza A	34	Yes	All other signs of infection	Suggestive		Human	Diagnostic	1	3.875
Barzago, C. 2016, Immunobiology	Prospective Case-Control Study	Epstein-Barr Virus	34	Yes	All other signs of infection	Suggestive		Human	Diagnostic	1	3.875
Maradona, J.A. 1995, Clinical Infectious Diseases	Retrospective case report	Human Immunodeficiency Virus	15	Yes	All other signs of infection	No/Absent/Unclear/NA		Human	Diagnostic	1	1.8125
Leis, A.A. 2005, Current Treatment Options in Neurology	Retrospective Case Report	West Nile Virus	9	Yes	All other signs of infection	No/Absent/Unclear/NA		Human	Diagnostic	1	1.6875
Strong, J. 1998, Canadian Journal of Neurological Sciences	Retrospective Case Report	Human Immunodeficiency Virus	20	Yes	Serological detection of exposure	No/Absent/Unclear/NA		Human	Supportive	1	1.91667
Bhibhatbhan, A. 2007, Muscle & Nerve	Retrospective Case Report	Epstein-Barr Virus	22	Yes	Serological detection of exposure	No/Absent/Unclear/NA		Human	Diagnostic	1	2.29167
Cupler, E.J. 1996, Muscle & Nerve	Cross-Sectional Study	Human Immunodeficiency Virus	26	Yes	All other signs of infection	No/Absent/Unclear/NA		Human	Diagnostic	3	2.54167
Borgia, G. 2001, Journal of Interferon and Cytokine Research	Retrospective Case Report	Hepatitis C Virus	22	Yes	Direct organism detection (culture, cytology, PCR)	No/Absent/Unclear/NA	Study describes the development of MG succeeding treatment with recombinant IFN-alpha2b therapy for HCV infection	Human	Diagnostic	1	2.625
Lagrange, S. 1997, Lupus.	Retrospective Case Report	Human Parvovirus B19	15	Yes	Serological detection of exposure	No/Absent/Unclear/NA	The article argues an association between amicrobial pustulosis and autoimmune disease, including MG	Human	Supportive	1	1.8125
Caponnetto, C. 2001, European Neurology.	Retrospective Case Report	Hepatitis C Virus	20	Yes	Direct organism detection (culture, cytology, PCR)	No/Absent/Unclear/NA		Human	Diagnostic	1	2.58333
Wessel, H.B. 1987, Pediatric Neurology	Retrospective Case Report	Human T Lymphotropic Virus Type III	12	Yes	Serological detection of exposure	No/Absent/Unclear/NA		Human	Supportive	1	1.75
Urdaneta-Carruyo, E. 2000, Journa of Paediatrics and Child Health	Retrospective Case Report	Clostridium botulinum	18	Yes	Direct organism detection (culture, cytology, PCR)	Supportive	Patient experienced motor recovery after infection was resolved, however, MG diagnosis was not confirmed	Human	Supportive	1	3.54167
Cavalcante, P. 2017, Oncotarget	Prospective Case-Control Study	Epstein-Barr Virus	36	Yes	Direct organism detection (culture, cytology, PCR)	Suggestive		Human	Diagnostic	21	5.25
Chteinberg, E. 2019, Thoracic Oncology	Prospective Case-Control Study	Merkel Cell Polyomavirus	22	Yes	Direct organism detection (culture, cytology, PCR)	No/Absent/Unclear/NA	Argues against MCPyV as a cause of thymoma/MG	Human	Diagnostic	2	-3.79167
Nath, A. 1990, Neurology	Retrospective Case Report	Human Immunodeficiency Virus	22	Yes	Serological detection of exposure	No/Absent/Unclear/NA		Human	Diagnostic	1	2.29167
Gorthi, S.P. 2005, Journal of the Association of Physicians of India	Retrospective Case Report	Human Immunodeficiency Virus	22	Yes	Serological detection of exposure	No/Absent/Unclear/NA		Human	Diagnostic	1	2.29167
Kurokawa, T. 2008, Rinsho Shinkeigaku.	Retrospective Case Report	Human Immunodeficiency Virus	24	Yes	Direct organism detection (culture, cytology, PCR)	No/Absent/Unclear/NA		Human	Diagnostic	1	2.66667
Cufi, P. 2014, Journal of Autoimmunity	Prospective Case-Control Study	Human Papillomavirus	33	Yes	All other signs of infection	No/Absent/Unclear/NA	Elevated mRNA expression levels for p16 (a marker for HPV infections) were demonstrated in 11 MG-T patient samples. No MG samples demonstrated presence of HPV DNA.	Human	Diagnostic	11	4.35417
Knopf, L. 2010, Journal of Clinical Neuromuscular Disease	Retrospective Case Report	Human Immunodeficiency Virus	24	Yes	Direct organism detections (culture, cytology, PCR)	No/Absent/Unclear/NA	Patient was diagnosed with HIV at the age of 14 and was only diagnosed with MG at 27 - the onset of MG occurs multiple years after initial diagnosis of infection. Noted that the patient developed MG shortly after starting therapy with ritonavir (possible drug related onset of MG)	Human	Diagnostic	1	2.66667
Kuntzer, T. 2011, Neurology	Retrospective Case Report	Human Immunodeficiency Virus	24	Yes	Direct organism detections (culture, cytology, PCR)	No/Absent/Unclear/NA		Human	Diagnostic	1	2.66667
Ragunathan, K. 2015, Journal of Neurology	Retrospective Case Report	Human Immunodeficiency Virus	19	Yes	All other signs of infection	No/Absent/Unclear/NA	Does not indicate how HIV infection was diagnosed - "female with established HIV infection"	Human	Diagnostic	1	1.89583
Martini, L. 1991, Revue Neurologique	Retrospective Case Report	Human Immunodeficiency Virus	20	Yes	Serological detection of exposure	No/Absent/Unclear/NA		Human	Diagnostic	1	2.25
Tiab, M. 1993, Annales de médicine interne	Restrospective Case Series	Human Immunodeficiency Virus	23	Yes	All other signs of infection	No/Absent/Unclear/NA		Human	Diagnostic	2	2.14583
Matsuda, M. 2000, Internal Medicine.	Retrospective Case Report	Hepatitis B Virus	24	Yes	Direct organism detection (culture, cytology, PCR) *positive for Hep B surface antigen	No/Absent/Unclear/NA		Human	Diagnostic	1	2.66667
Santantonio, T. 2006, Journal of Hepatology	Retrospective Case Report	Hepatitis C Virus	17	Yes	Direct organism detection (culture, cytology, PCR)	No/Absent/Unclear/NA	MG developed following treatment with higher doses of nIFN	Human	Diagnostic	1	2.52083
Csuka, D. 2012, European Journal of Neurology	Prospective Case-Control Study	Epstein-Barr Virus	42	Yes	Serological detection of exposure	Suggestive		Human	Supportive	42	4.70833
									Total:	169
										MEAN IME SCORE:	2.54167
										MEDIAN IME SCORE	2.64583

## Sheet: IME Calculations
First author, year, journal	D score: Does the infectious agent induce (or is associated with) MG as a part of the hypothesis or specific aims or is the question that an infection induces (or is associated with) MG answered by study design?	D Score	Normalized D score	Q1: Is (are) the study hypothesis (hypotheses) that an infectious disease induces (or is associated with) MG clearly stated, OR is the question that an infectious disease induces (or is associated with) MG clearly answered by study design?	Q1 Score	Q2: Is (are) the specific aim(s)/objective(s) of the study clearly stated AND does at least one aim/objective include a means to identify whether an infectious disease induces (or is associated with) MG?	Q2 Score	Q3: Does the study involve multiple hospitals, clinics, and/or research institutions? (patients)	Q3 Score	Q4: Does the study include clear inclusion/exclusion criteria?	Q4 Score	Q5: Is there data on the cases screened and excluded from the study?	Q5 Score	Q6: Are there search terms/keywords described?	Q6 Score	Q7: Does the study describe multiple different infectious diseases?	Q7 Score	Q8: Is clinical status clearly defined in relation to infection?	Q8 Score	Q9: Are the results clearly and objectively presented?	Q9 Score	Q10: Are appropriate statistical tests used?	Q10 Score	Q11: Is the measure of variability reported?	Q11 Score	Q12: Is the conclusion supported by the reported results?	Q12 Score	Q13: Is there a clear conflict of interest/disclosure statement?	Q13 Score	Total Q Score	Normalized Q Score	C Score: Confidence of infectious disease diagnosis	C Score	Normalized C Score	L Score: Causal link between MG and Infection	L Score	Normalized L Score	I Score: Confidence of MG Diagnosis	I Score	Normalized I Score	N Score: Number of MG patients infected	N Score	Normalized N Score	IME
Cavalcante, P. 2010, Neurology	Prospective Case-Control Study	4	0.666667	Yes	2	Partially reported/suggested	1	No/Absent/Unclear/NA	0	No/Absent/Unclear/NA	0	No/Absent/Unclear/NA	0	No/Absent/Unclear/NA	0	All cases are of one type or if diseases of disparate nature were analyzed in separate homogenous groups	2	No/Absent/Unclear/NA	0	Yes	2	Yes	2	No/Absent/Unclear/NA	0	Yes	2	Yes	2	30	0.625	Direct organism detection	3	1	Suggestive	1	0.333333	Supportive	1	0.333333	4	2	0.333333	4.29167
Cavalcante, P. 2010, Annals of Neurology	Prospective Case-Control Study	4	0.666667	Yes	2	Yes	2	No/Absent/Unclear/NA	0	No/Absent/Unclear/NA	0	No/Absent/Unclear/NA	0	No/Absent/Unclear/NA	0	All cases are of one type or if diseases of disparate nature were analyzed in separate homogenous groups	2	No/Absent/Unclear/NA	0	Yes	2	No/Absent/Unclear/NA	0	No/Absent/Unclear/NA	0	Yes	2	Yes	2	26	0.541667	Direct organism detection	3	1	Suggestive	1	0.333333	Diagnostic	2	0.666667	14 (**only includes MG patients positive for anti-AChR antibodies and the pathogen)	4	0.666667	4.875
Hung, W-L. 2011, Clinical Neurology and Neuroscience	Restrospective Case Report	1	0.166667	Yes	2	No/Absent/Unclear/NA	0	No/Absent/Unclear/NA	0	No/Absent/Unclear/NA	0	No/Absent/Unclear/NA	0	Yes	2	All cases are of one type or if diseases of disparate nature were analyzed in separate homogenous groups	2	Yes	2	Yes	2	No/Absent/Unclear/NA	0	No/Absent/Unclear/NA	0	Yes	2	No/Absent/Unclear/NA	0	26	0.541667	Direct organism detection	3	1	No/Absent/Unclear/NA	0	0	Diagnostic	2	0.666667	1	1	0.166667	2.70833
Tackenberg, B. 2009, Journal of Neuroimmunology	Prospective Case-Control Study	4	0.666667	Yes	2	No/Absent/Unclear/NA	0	No/Absent/Unclear/NA	0	Yes	2	No/Absent/Unclear/NA	0	Yes	2	All cases are of one type or if diseases of disparate nature were analyzed in separate homogenous groups	2	No/Absent/Unclear/NA	0	Yes	2	Yes	2	Yes	2	Yes	2	No/Absent/Unclear/NA	0	34	0.708333	Serological detection of exposure	2	0.666667	No/Absent/Unclear/NA	0	0	Diagnostic	2	0.666667	46	5	0.833333	4.20833
Tomschik M, 2019, Emerging Infectious Diseases	Restrospective Case Report	1	0.166667	Yes	2	No/Absent/Unclear/NA	0	No/Absent/Unclear/NA	0	No/Absent/Unclear/NA	0	No/Absent/Unclear/NA	0	Yes	2	All cases are of one type or if diseases of disparate nature were analyzed in separate homogenous groups	2	Yes	2	Partially reported/suggested (lack of results section)	1	No/Absent/Unclear/NA	0	No/Absent/Unclear/NA	0	Yes	2	No/Absent/Unclear/NA	0	23	0.479167	Serological detection of exposure	2	0.666667	Supportive	2	0.666667	Supportive	1	0.333333	1	1	0.166667	3.3125
Leis, A.A. 2013, Muscle & Nerve	Retrospective Case Series	1	0.166667	Yes	2	Partially reported/suggested	1	Yes	2	No/Absent/Unclear/NA	0	Partially reported/suggested	1	Yes	2	All cases are of one type or if diseases of disparate nature were analyzed in separate homogenous groups	2	Yes	2	Yes	2	No/Absent/Unclear/NA	0	No/Absent/Unclear/NA	0	Yes	2	No/Absent/Unclear/NA	0	31	0.645833	Serological detection of exposure	2	0.666667	Suggestive	1	0.333333	Diagnostic	2	0.666667	6	3	0.5	3.47917
Molko, N. 2017, Neurology	Retrospective Case Series	1	0.166667	Yes	2	No/Absent/Unclear/NA	0	No/Absent/Unclear/NA	0	No/Absent/Unclear/NA	0	No/Absent/Unclear/NA	0	No/Absent/Unclear/NA	0	All cases are of one type or if diseases of disparate nature were analyzed in separate homogenous groups	2	No/Absent/Unclear/NA	0	Yes	2	No/Absent/Unclear/NA	0	No/Absent/Unclear/NA	0	Yes	2	Yes	2	22	0.458333	Direct organism detection	3	1	No/Absent/Unclear/NA	0	0	Diagnostic	2	0.666667	2	2	0.333333	2.79167
Sherpa, M. 2017, The American Journal of Case Reports	Restrospective case report	1	0.166667	Yes	2	No/Absent/Unclear/NA	0	No/Absent/Unclear/NA	0	No/Absent/Unclear/NA	0	No/Absent/Unclear/NA	0	Yes	2	All cases are of one type or if diseases of disparate nature were analyzed in separate homogenous groups	2	No/Absent/Unclear/NA	0	Yes	2	No/Absent/Unclear/NA	0	No/Absent/Unclear/NA	0	Yes	2	Yes	2	24	0.5	Direct organism detection	3	1	No/Absent/Unclear/NA	0	0	Diagnostic	2	0.666667	1	1	0.166667	2.66667
Cavalcante, P, 2011, Autoimmune Diseases	Prospective Case-Control Study	4	0.666667	Yes	2	Yes	2	No/Absent/Unclear/NA	0	No/Absent/Unclear/NA	0	No/Absent/Unclear/NA	0	No/Absent/Unclear/NA	0	All cases are of one type or if diseases of disparate nature were analyzed in separate homogenous groups	2	No/Absent/Unclear/NA	0	Yes	2	Yes	2	Yes	2	Yes	2	Yes	2	36	0.75	Direct organism detection	3	1	Suggestive	1	0.333333	Diagnostic	2	0.666667	10 (**only includes MG patients positive for anti-AChR antibodies and EBV DNA)	3	0.5	4.91667
Greco, M. 2016, Journal of Clinical Medicine Research	Cross-Sectional Study	2	0.333333	Yes	2	Partially reported/suggested	1	No/Absent/Unclear/NA	0	No/Absent/Unclear/NA	0	No/Absent/Unclear/NA	0	Yes	2	All cases are of one type or if diseases of disparate nature were analyzed in separate homogenous groups	2	No/Absent/Unclear/NA	0	Yes	2	No/Absent/Unclear/NA	0	No/Absent/Unclear/NA	0	Yes	2	Yes	2	26	0.541667	Serological detection of exposure	2	0.666667	Suggestive	1	0.333333	Diagnostic	2	0.666667	5	2	0.333333	3.54167
Christopoulos, P. 2015, Journal of Immunology	Prospective case-control Study	4	0.666667	Yes	2	No/Absent/Unclear/NA	0	No/Absent/Unclear/NA	0	No/Absent/Unclear/NA	0	No/Absent/Unclear/NA	0	No/Absent/Unclear/NA	0	All cases are of one type or if diseases of disparate nature were analyzed in separate homogenous groups	2	Yes	2	Yes	2	No/Absent/Unclear/NA	0	No/Absent/Unclear/NA	0	Yes	2	Yes	2	26	0.541667	Direct organism detection	3	1	No/Absent/Unclear/NA	0	0	Diagnostic	2	0.666667	1	1	0.166667	3.70833
Saha, A. 2007, Singapore Medical Journal	Retrospective Case Report	1	0.166667	Yes	2	No/Absent/Unclear/NA	0	No/Absent/Unclear/NA	0	No/Absent/Unclear/NA	0	No/Absent/Unclear/NA	0	Yes	2	All cases are of one type or if diseases of disparate nature were analyzed in separate homogenous groups	2	Yes	2	Yes	2	No/Absent/Unclear/NA	0	No/Absent/Unclear/NA	0	Yes	2	No/Absent/Unclear/NA	0	26	0.541667	All other signs of infection	1	0.333333	No/Absent/Unclear/NA	0	0	Supportive	1	0.333333	1	1	0.166667	1.70833
Halfon, P. 1996, Journal of Viral Hepatitis	Cross-Sectional Study	2	0.333333	Yes	2	Yes	2	No/Absent/Unclear/NA	0	No/Absent/Unclear/NA	0	No/Absent/Unclear/NA	0	Yes	2	All cases are of one type or if diseases of disparate nature were analyzed in separate homogenous groups	2	No/Absent/Unclear/NA	0	Yes	2	No/Absent/Unclear/NA	0	No/Absent/Unclear/NA	0	Yes	2	No/Absent/Unclear/NA	0	26	0.541667	Direct organism detection	3	1	No/Absent/Unclear/NA	0	0	Diagnostic	2	0.666667	3	2	0.333333	-3.20833
Belbezier, A. 2014, Emerging Infectious Diseases	Retrospective Case Report	1	0.166667	Yes	2	No/Absent/Unclear/NA	0	No/Absent/Unclear/NA	0	No/Absent/Unclear/NA	0	No/Absent/Unclear/NA	0	No/Absent/Unclear/NA	0	Stratification is suggested but details are not explicitly stated	1	Yes	2	Partially reported/suggested (lack of results section)	1	No/Absent/Unclear/NA	0	No/Absent/Unclear/NA	0	Yes	2	No/Absent/Unclear/NA	0	19	0.395833	Direct organism detection	3	1	No/Absent/Unclear/NA	0	0	Diagnostic	2	0.666667	1	1	0.166667	2.5625
Eddy, S. 1999, Digestive Diseases and Sciences	Retrospective Case Report	1	0.166667	Yes	2	No/Absent/Unclear/NA	0	No/Absent/Unclear/NA	0	No/Absent/Unclear/NA	0	No/Absent/Unclear/NA	0	Yes	2	All cases are of one type or if diseases of disparate nature were analyzed in separate homogenous groups	2	Yes	2	Partially reported/suggested	1	No/Absent/Unclear/NA	0	No/Absent/Unclear/NA	0	Yes	2	No/Absent/Unclear/NA	0	23	0.479167	Direct organism detection	3	1	No/Absent/Unclear/NA	0	0	Diagnostic	2	0.666667	1	1	0.166667	2.64583
Kakalacheva, K. 2011, Annals of Neurology	Prospective Case-Control Study	4	0.666667	Yes	2	Yes	2	No/Absent/Unclear/NA	0	No/Absent/Unclear/NA	0	No/Absent/Unclear/NA	0	No/Absent/Unclear/NA	0	All cases are of one type or if diseases of disparate nature were analyzed in separate homogenous groups	2	No/Absent/Unclear/NA	0	Yes	2	No/Absent/Unclear/NA	0	No/Absent/Unclear/NA	0	Yes	2	Yes	2	26	0.541667	Direct organism detection	2	0.666667	No/Absent/Unclear/NA	0	0	Diagnostic	2	0.666667	4	2	0.333333	-3.54167
Rennspiess, D. 2015, Journal of Thoracic Oncology	Prospective Case-Control Study	4	0.666667	Partially reported/suggested (address polyomavirus as a cause of thymoma)	1	No/Absent/Unclear/NA	0	No/Absent/Unclear/NA	0	No/Absent/Unclear/NA	0	No/Absent/Unclear/NA	0	Yes	2	All cases are of one type or if diseases of disparate nature were analyzed in separate homogenous groups	2	No/Absent/Unclear/NA	0	Yes	2	No/Absent/Unclear/NA	0	No/Absent/Unclear/NA	0	Yes	2	Yes	2	22	0.458333	Direct organism detection	3	1	No/Absent/Unclear/NA	0	0	Diagnostic	2	0.666667	10 (**note that only patients MG patients positive for anti-AChR antibodies and positive for HPyV7 sTAg-PCR and LTAg-PCR were included)	3	0.5	3.95833
Felice, K.J. 2005, Journal of Child Neurology	Retrospective case report	1	0.166667	Yes	2	No/Absent/Unclear/NA	0	No/Absent/Unclear/NA	0	No/Absent/Unclear/NA	0	No/Absent/Unclear/NA	0	No/Absent/Unclear/NA	0	All cases are of one type or if diseases of disparate nature were analyzed in separate homogenous groups	2	Yes	2	Yes	2	No/Absent/Unclear/NA	0	No/Absent/Unclear/NA	0	Yes	2	No/Absent/Unclear/NA	0	24	0.5	All other signs of infection	1	0.333333	Supportive	2	0.666667	Supportive	1	0.333333	1 (**note only the patient with supportive diagnosis (electrophysiology confirmed) of MG was assessed)	1	0.166667	3
Fukui, T. 1994, European Neurology	Retrospective case report	1	0.166667	Yes	2	No/Absent/Unclear/NA	0	No/Absent/Unclear/NA	0	No/Absent/Unclear/NA	0	No/Absent/Unclear/NA	0	Yes	2	All cases are of one type or if diseases of disparate nature were analyzed in separate homogenous groups	2	Yes	2	Yes	2	No/Absent/Unclear/NA	0	No/Absent/Unclear/NA	0	Yes	2	No/Absent/Unclear/NA	0	26	0.541667	Serological detection of exposure	2	0.666667	No/Absent/Unclear/NA	0	0	Diagnostic	2	0.666667	1	1	0.166667	2.375
Authier, F.J. 1995, Muscle & Nerve	Retrospective case report	1	0.166667	Yes	2	No/Absent/Unclear/NA	0	No/Absent/Unclear/NA	0	No/Absent/Unclear/NA	0	No/Absent/Unclear/NA	0	No/Absent/Unclear/NA	0	All cases are of one type or if diseases of disparate nature were analyzed in separate homogenous groups	2	Partially reported/suggested	1	Yes	2	No/Absent/Unclear/NA	0	No/Absent/Unclear/NA	0	Partially reported/suggested (patient experienced relapse of myasthenic symptoms despite consistent antiretroviral therapy)	1	No/Absent/Unclear/NA	0	19	0.395833	Serological detection of exposure	2	0.666667	No/Absent/Unclear/NA	0	0	Supportive	1	0.333333	1	1	0.166667	1.89583
Lalive, P.H. 2007, Muscle & Nerve	Retrospective case report	1	0.166667	Yes	2	No/Absent/Unclear/NA	0	No/Absent/Unclear/NA	0	No/Absent/Unclear/NA	0	No/Absent/Unclear/NA	0	Yes	2	All cases are of one type or if diseases of disparate nature were analyzed in separate homogenous groups	2	Yes	2	Yes	2	No/Absent/Unclear/NA	0	No/Absent/Unclear/NA	0	Yes	2	No/Absent/Unclear/NA	0	26	0.541667	Direct organism detection	3	1	No/Absent/Unclear/NA	0	0	Diagnostic	2	0.666667	1	1	0.166667	2.70833
Mori, M. 2006, Journal of Neurological Sciences	Retrospective case report	1	0.166667	Yes	2	No/Absent/Unclear/NA	0	No/Absent/Unclear/NA	0	No/Absent/Unclear/NA	0	No/Absent/Unclear/NA	0	Yes	2	All cases are of one type or if diseases of disparate nature were analyzed in separate homogenous groups	2	Yes	2	Yes	2	No/Absent/Unclear/NA	0	No/Absent/Unclear/NA	0	Yes	2	No/Absent/Unclear/NA	0	26	0.541667	Serological detection of exposure	2	0.666667	No/Absent/Unclear/NA	0	0	Diagnostic	2	0.666667	1	1	0.166667	2.375
Korn, I.L. 1981, European Neurology (case 3)	Retrospective case report	1	0.166667	Yes	2	No/Absent/Unclear/NA	0	No/Absent/Unclear/NA	0	No/Absent/Unclear/NA	0	No/Absent/Unclear/NA	0	Yes	2	All cases are of one type or if diseases of disparate nature were analyzed in separate homogenous groups	2	Yes	2	Partially reported/suggested	1	No/Absent/Unclear/NA	0	No/Absent/Unclear/NA	0	Yes	2	No/Absent/Unclear/NA	0	23	0.479167	All other signs of infection	1	0.333333	No/Absent/Unclear/NA	0	0	Diagnostic	2	0.666667	1	1	0.166667	1.97917
Korn, I.L. 1981, European Neurology (case 4)	Retrospective case report	1	0.166667	Yes	2	No/Absent/Unclear/NA	0	No/Absent/Unclear/NA	0	No/Absent/Unclear/NA	0	No/Absent/Unclear/NA	0	Yes	2	All cases are of one type or if diseases of disparate nature were analyzed in separate homogenous groups	2	No/Absent/Unclear/NA	0	Partially reported/suggested	1	No/Absent/Unclear/NA	0	No/Absent/Unclear/NA	0	Yes	2	No/Absent/Unclear/NA	0	19	0.395833	All other signs of infection	1	0.333333	No/Absent/Unclear/NA	0	0	Diagnostic	2	0.666667	1	1	0.166667	1.89583
Barzago, C. 2016, Immunobiology	Prospective Case-Control Study	4	0.666667	Yes	2	Partially reported/suggested	1	No/Absent/Unclear/NA	0	Yes	2	No/Absent/Unclear/NA	0	Yes	2	All other references to disease heterogeneity	0	No/Absent/Unclear/NA	0	Yes	2	Yes	2	Yes	2	Yes	2	Yes	2	34	0.708333	All other signs of infection	1	0.333333	Suggestive	1	0.333333	Diagnostic	2	0.666667	1	1	0.166667	3.875
Barzago, C. 2016, Immunobiology	Prospective Case-Control Study	4	0.666667	Yes	2	Partially reported/suggested	1	No/Absent/Unclear/NA	0	Yes	2	No/Absent/Unclear/NA	0	Yes	2	All other references to disease heterogeneity	0	No/Absent/Unclear/NA	0	Yes	2	Yes	2	Yes	2	Yes	2	Yes	2	34	0.708333	All other signs of infection	1	0.333333	Suggestive	1	0.333333	Diagnostic	2	0.666667	1	1	0.166667	3.875
Barzago, C. 2016, Immunobiology	Prospective Case-Control Study	4	0.666667	Yes	2	Partially reported/suggested	1	No/Absent/Unclear/NA	0	Yes	2	No/Absent/Unclear/NA	0	Yes	2	All other references to disease heterogeneity	0	No/Absent/Unclear/NA	0	Yes	2	Yes	2	Yes	2	Yes	2	Yes	2	34	0.708333	All other signs of infection	1	0.333333	Suggestive	1	0.333333	Diagnostic	2	0.666667	1	1	0.166667	3.875
Maradona, J.A. 1995, Clinical Infectious Diseases	Retrospective case report	1	0.166667	No	0	No/Absent/Unclear/NA	0	No/Absent/Unclear/NA	0	No/Absent/Unclear/NA	0	No/Absent/Unclear/NA	0	No/Absent/Unclear/NA	0	All cases are of one type or if diseases of disparate nature were analyzed in separate homogenous groups	2	Partially reported/suggested	1	Partially reported/suggested (lack of clear results section)	1	No/Absent/Unclear/NA	0	No/Absent/Unclear/NA	0	Yes	2	No/Absent/Unclear/NA	0	15	0.3125	All other signs of infection	1	0.333333	No/Absent/Unclear/NA	0	0	Diagnostic	2	0.666667	1	1	0.166667	1.8125
Leis, A.A. 2005, Current Treatment Options in Neurology	Retrospective Case Report	1	0.166667	Partially reported/suggested	1	No/Absent/Unclear/NA	0	No/Absent/Unclear/NA	0	No/Absent/Unclear/NA	0	No/Absent/Unclear/NA	0	No/Absent/Unclear/NA	0	All cases are of one type or if diseases of disparate nature were analyzed in separate homogenous groups	2	No/Absent/Unclear/NA	0	Partially reported/suggested	1	No/Absent/Unclear/NA	0	No/Absent/Unclear/NA	0	No/Absent/Unclear/NA	0	No/Absent/Unclear/NA	0	9	0.1875	All other signs of infection (no clear definition of disease diagnosis)	1	0.333333	No/Absent/Unclear/NA	0	0	Diagnostic	2	0.666667	1	1	0.166667	1.6875
Strong, J. 1998, Canadian Journal of Neurological Sciences	Retrospective Case Report	1	0.166667	Partially reported/suggested	1	No/Absent/Unclear/NA	0	No/Absent/Unclear/NA	0	No/Absent/Unclear/NA	0	No/Absent/Unclear/NA	0	No/Absent/Unclear/NA	0	All cases are of one type or if diseases of disparate nature were analyzed in separate homogenous groups	2	Partially reported/suggested	1	Yes	2	No/Absent/Unclear/NA	0	No/Absent/Unclear/NA	0	Yes	2	No/Absent/Unclear/NA	0	20	0.416667	Serological detection of exposure	2	0.666667	No/Absent/Unclear/NA	0	0	Supportive	1	0.333333	1	1	0.166667	1.91667
Bhibhatbhan, A. 2007, Muscle & Nerve	Retrospective Case Report	1	0.166667	Partially reported/suggested	1	No/Absent/Unclear/NA	0	no/Absent/Unclear/NA	0	No/Absent/Unclear/NA	0	No/Absent/Unclear/NA	0	Yes	2	All cases are of one type or if diseases of disparate nature were analyzed in separate homogenous groups	2	Partially reported/suggested	1	Yes	2	No/Absent/Unclear/NA	0	No/Absent/Unclear/NA	0	Yes	2	No/Absent/Unclear/NA	0	22	0.458333	Serological detection of exposure	2	0.666667	No/Absent/Unclear/NA	0	0	Diagnostic	2	0.666667	1	1	0.166667	2.29167
Cupler, E.J. 1996, Muscle & Nerve	Cross-Sectional Study	2	0.333333	Yes	2	No/Absent/Unclear/NA	0	No/Absent/Unclear/NA	0	No/Absent/Unclear/NA	0	No/Absent/Unclear/NA	0	Yes	2	All cases are of one type or if diseases of disparate nature were analyzed in separate homogenous groups	2	Yes	2	Yes	2	No/Absent/Unclear/NA	0	No/Absent/Unclear/NA	0	Yes	2	No/Absent/Unclear/NA	0	26	0.541667	All other signs of infection	1	0.333333	No/Absent/Unclear/NA	0	0	Diagnostic	2	0.666667	3	2	0.333333	2.54167
Borgia, G. 2001, Journal of Interferon and Cytokine Research	Retrospective Case Report	1	0.166667	Partially reported/suggested	1	No/Absent/Unclear/NA	0	No/Absent/Unclear/NA	0	No/Absent/Unclear/NA	0	No/Absent/Unclear/NA	0	No/Absent/Unclear/NA	0	All cases are of one type or if diseases of disparate nature were analyzed in separate homogenous groups	2	Yes	2	Yes	2	No/Absent/Unclear/NA	0	No/Absent/Unclear/NA	0	Yes	2	No/Absent/Unclear/NA	0	22	0.458333	Direct organism detection	3	1	No/Absent/Unclear/NA	0	0	Diagnostic	2	0.666667	1	1	0.166667	2.625
Lagrange, S. 1997, Lupus.	Retrospective Case Report	1	0.166667	No/Absent/Unclear/NA	0	No/Absent/Unclear/NA	0	No/Absent/Unclear/NA	0	No/Absent/Unclear/NA	0	No/Absent/Unclear/NA	0	Yes	2	Stratification is suggested but details are not explicitly stated	1	Partially reported/suggested	1	Yes	2	No/Absent/Unclear/NA	0	no/Absent/Unclear/NA	0	Partially reported/suggested	1	No/Absent/Unclear/NA	0	15	0.3125	Serological detection of exposure	2	0.666667	No/Absent/Unclear/NA	0	0	Supportive	1	0.333333	1	1	0.166667	1.8125
Caponnetto, C. 2001, European Neurology.	Retrospective Case Report	1	0.166667	Partially reported/suggested	1	No/Absent/Unclear/NA	0	No/Absent/Unclear/NA	0	No/Absent/Unclear/NA	0	No/Absent/Unclear/NA	0	No/Absent/Unclear/NA	0	All cases are of one type or if diseases of disparate nature were analyzed in separate homogenous groups	2	Partially reported/suggested	1	Yes	2	No/Absent/Unclear/NA	0	No/Absent/Unclear/NA	0	Yes	2	No/Absent/Unclear/NA	0	20	0.416667	Direct organism detection	3	1	No/Absent/Unclear/NA	0	0	Diagnostic	2	0.666667	1	1	0.166667	2.58333
Wessel, H.B. 1987, Pediatric Neurology	Retrospective Case Report	1	0.166667	Partially reported/suggested	1	No/Absent/Unclear/NA	0	No/Absent/Unclear/NA	0	No/Absent/Unclear/NA	0	No/Absent/Unclear/NA	0	No/Absent/Unclear/NA	0	Stratification is suggested but details are not explicitly stated	1	Partially reported/suggested	1	Partially reported/suggested	1	No/Absent/Unclear/NA	0	No/Absent/Unclear/NA	0	Partially reported/suggested	1	No/Absent/Unclear/NA	0	12	0.25	Serological detection of exposure	2	0.666667	No/Absent/Unclear/NA	0	0	Supportive	1	0.333333	1	1	0.166667	1.75
Urdaneta-Carruyo, E. 2000, Journa of Paediatrics and Child Health	Retrospective Case Report	1	0.166667	Partially reported/suggested	1	No/Absent/Unclear/NA	0	No/Absent/Unclear/NA	0	No/Absent/Unclear/NA	0	No/Absent/Unclear/NA	0	Yes	2	All cases are of one type or if diseases of disparate nature were analyzed in separate homogenous groups	2	Yes	2	Yes	2	No/Absent/Unclear/NA	0	No/Absent/Unclear/NA	0	No/Absent/Unclear/NA	0	No/Absent/Unclear/NA	0	18	0.375	Direct organism detection	3	1	Supportive	2	0.666667	Supportive	1	0.333333	1	1	0.166667	3.54167
Cavalcante, P. 2017, Oncotarget	Prospective Case-Control Study	4	0.666667	Yes	2	Partially reported/suggested	1	No/Absent/Unclear/NA	0	No/Absent/Unclear/NA	0	No/Absent/Unclear/NA	0	Yes	2	All cases are of one type or if diseases of disparate nature were analyzed in separate homogenous groups	2	No/Absent/Unclear/NA	0	Yes	2	Yes	2	Yes	2	Yes	2	Yes	2	36	0.75	Direct organism detection	3	1	Suggestive	1	0.333333	Diagnostic	2	0.666667	21	5	0.833333	5.25
Chteinberg, E. 2019, Thoracic Oncology	Prospective Case-Control Study	4	0.666667	Yes	2	Partially reported/suggested	1	No/Absent/Unclear/NA	0	No/Absent/Unclear/NA	0	No/Absent/Unclear/NA	0	Yes	2	All other references to disease heterogeneity	0	No/Absent/Unclear/NA	0	Yes	2	No/Absent/Unclear/NA	0	No/Absent/Unclear/NA	0	Yes	2	Yes	2	22	0.458333	Direct organism detection	3	1	No/Absent/Unclear/NA	0	0	DIagnostic	2	0.666667	2	2	0.333333	-3.79167
Nath, A. 1990, Neurology	Restrospective Case Report	1	0.166667	Partially reported/suggested	1	No/Absent/Unclear/NA	0	No/Absent/Unclear/NA	0	No/Absent/Unclear/NA	0	No/Absent/Unclear/NA	0	No/Absent/Unclear/NA	0	All cases are of one type or if diseases of disparate nature were analyzed in separate homogenous groups	2	Yes	2	Yes	2	No/Absent/Unclear/NA	0	No/Absent/Unclear/NA	0	Yes	2	No/Absent/Unclear/NA	0	22	0.458333	Serological detection of exposure	2	0.666667	No/Absent/Unclear/NA	0	0	Diagnostic	2	0.666667	1	1	0.166667	2.29167
Gorthi, S.P. 2005, Journal of the Association of Physicians of India	Restrospective Case Report	1	0.166667	Partially reported/suggested	1	No/Absent/Unclear/NA	0	No/Absent/Unclear/NA	0	No/Absent/Unclear/NA	0	No/Absent/Unclear/NA	0	No/Absent/Unclear/NA	0	All cases are of one type or if diseases of disparate nature were analyzed in separate homogenous groups	2	Yes	2	Yes	2	No/Absent/Unclear/NA	0	No/Absent/Unclear/NA	0	Yes	2	No/Absent/Unclear/NA	0	22	0.458333	Serological detection of exposure	2	0.666667	No/Absent/Unclear/NA	0	0	Diagnostic	2	0.666667	1	1	0.166667	2.29167
Kurokawa, T. 2008, Rinsho Shinkeigaku.	Restrospective Case Report	1	0.166667	Partially reported/suggested	1	No/Absent/Unclear/NA	0	No/Absent/Unclear/NA	0	No/Absent/Unclear/NA	0	No/Absent/Unclear/NA	0	Yes	2	All cases are of one type or if diseases of disparate nature were analyzed in separate homogenous groups	2	Yes	2	Yes	2	No/Absent/Unclear/NA	0	No/Absent/Unclear/NA	0	Yes	2	No/Absent/Unclear/NA	0	24	0.5	Direct organism detection	3	1	No/Absent/Unclear/NA	0	0	Diagnostic	2	0.666667	1	1	0.166667	2.66667
Cufi, P. 2014, Journal of Autoimmunity	Prospective Case-Control Study	4	0.666667	Partially reported/suggested	1	Partially reported/suggested	1	No/Absent/Unclear/NA	0	Partially reported/suggested	1	No/Absent/Unclear/NA	0	Yes	2	All cases are of one type or if diseases of disparate nature were analyzed in separate homogenous groups	2	No/Absent/Unclear/NA	0	Yes	2	Yes	2	Yes	2	Yes	2	No/Absent/Unclear/NA	0	33	0.6875	All other signs of infection	1	0.333333	Suggestive	1	0.333333	Diagnostic	2	0.666667	11	4	0.666667	4.35417
Knopf, L. 2010, Journal of Clinical Neuromuscular Disease	Retrospective Case Report	1	0.166667	Partially reported/suggested	1	No/Absent/Unclear/NA	0	No/Absent/Unclear/NA	0	No/Absent/Unclear/NA	0	No/Absent/Unclear/NA	0	Yes	2	All cases are of one type or if diseases of disparate nature were analyzed in separate homogenous groups	2	Yes	2	Yes	2	No/Absent/Unclear/NA	0	No/Absent/Unclear/NA	0	Yes	2	No/Absent/Unclear/NA	0	24	0.5	Direct organism detection	3	1	No/Absent/Unclear/NA	0	0	Diagnostic	2	0.666667	1	1	0.166667	2.66667
Kuntzer, T. 2011, Neurology	Retrospective Case Report	1	0.166667	Partially reported/suggested	1	No/Absent/Unclear/NA	0	No/Absent/Unclear/NA	0	No/Absent/Unclear/NA	0	No/Absent/Unclear/NA	0	No/Absent/Unclear/NA	0	All cases are of one type or if diseases of disparate nature were analyzed in separate homogenous groups	2	Yes	2	Yes	2	No/Absent/Unclear/NA	0	No/Absent/Unclear/NA	0	Yes	2	Yes	2	24	0.5	Direct organism detection	3	1	No/Absent/Unclear/NA	0	0	Diagnostic	2	0.666667	1	1	0.166667	2.66667
Ragunathan, K. 2015, Journal of Neurology	Retrospective Case Report	1	0.166667	Partially reported/suggested	1	No/Absent/Unclear/NA	0	No/Absent/Unclear/NA	0	No/Absent/Unclear/NA	0	No/Absent/Unclear/NA	0	No/Absent/Unclear/NA	0	All cases are of one type or if diseases of disparate nature were analyzed in separate homogenous groups	2	Partially reported/suggested	1	Partially reported/suggested (lack of clear results section)	1	No/Absent/Unclear/NA	0	No/Absent/Unclear/NA	0	Yes	2	Yes	2	19	0.395833	All other signs of infection (no clear definition of disease diagnosis)	1	0.333333	No/Absent/Unclear/NA	0	0	Diagnostic	2	0.666667	1	1	0.166667	1.89583
Martini, L. 1991, Revue Neurologique	Retrospective Case Report	1	0.166667	Partially reported/suggested	1	No/Absent/Unclear/NA	0	No/Absent/Unclear/NA	0	No/Absent/Unclear/NA	0	No/Absent/Unclear/NA	0	No/Absent/Unclear/NA	0	All cases are of one type or if diseases of disparate nature were analyzed in separate homogenous groups	2	Partially reported/suggested	1	Yes	2	No/Absent/Unclear/NA	0	No/Absent/Unclear/NA	0	Yes	2	No/Absent/Unclear/NA	0	20	0.416667	Serological detection of exposure	2	0.666667	No/Absent/Unclear/NA	0	0	Diagnostic	2	0.666667	1	1	0.166667	2.25
Tiab, M. 1993, Annales de médicine interne	Retrospective Case Series	1	0.166667	Partially reported/suggested	1	No/Absent/Unclear/NA	0	No/Absent/Unclear/NA	0	Partially reported/suggested	1	No/Absent/Unclear/NA	0	No/Absent/Unclear/NA	0	All cases are of one type or if diseases of disparate nature were analyzed in separate homogenous groups	2	Yes	2	Yes	2	No/Absent/Unclear/NA	0	No/Absent/Unclear/NA	0	Yes	2	No/Absent/Unclear/NA	0	23	0.479167	All other signs of infection (no clear definition of disease diagnosis)	1	0.333333	No/Absent/Unclear/NA	0	0	Diagnostic	2	0.666667	2	2	0.333333	2.14583
Matsuda, M. 2000, Internal Medicine.	Retrospective Case Report	1	0.166667	Partially reported/suggested	1	No/Absent/Unclear/NA	0	No/Absent/Unclear/NA	0	No/Absent/Unclear/NA	0	No/Absent/Unclear/NA	0	Yes	2	All cases are of one type or if diseases of disparate nature were analyzed in separate homogenous groups	2	Yes	2	Yes	2	No/Absent/Unclear/NA	0	No/Absent/Unclear/NA	0	Yes	2	No/Absent/Unclear/NA	0	24	0.5	Direct organism detection	3	1	No/Absent/Unclear/NA	0	0	Diagnostic	2	0.666667	1	1	0.166667	2.66667
Santantonio, T. 2006, Journal of Hepatology	Retrospective Case Report	1	0.166667	Partially reported/suggested	1	No/Absent/Unclear/NA	0	No/Absent/Unclear/NA	0	No/Absent/Unclear/NA	0	No/Absent/Unclear/NA	0	No/Absent/Unclear/NA	0	All cases are of one type or if diseases of disparate nature were analyzed in separate homogenous groups	2	Partially reported/suggested	1	Partially reported/suggested	1	No/Absent/Unclear/NA	0	No/Absent/Unclear/NA	0	Yes	2	No/Absent/Unclear/NA	0	17	0.354167	Direct organism detection	3	1	No/Absent/Unclear/NA	0	0	Diagnostic	2	0.666667	1	1	0.166667	2.52083
Csuka, D. 2012, European Journal of Neurology	Prospective Case-Control Study	4	0.666667	Yes	2	Partially reported/suggested	1	Yes	2	Yes	2	Yes	2	Yes	2	All cases are of one type or if diseases of disparate nature were analyzed in separate homogenous groups	2	No/Absent/Unclear/NA	0	Yes	2	Yes	2	Yes	2	Yes	2	Yes	2	42	0.875	Serological detection of exposure	2	0.666667	Suggestive	1	0.333333	Supportive	1	0.333333	42	5	0.833333	4.70833

## Sheet: Study Design Guideline
Study design (in descending order of level of evidence)	Descriptor
Blinded randomized control trial or experiment (prospective)	A blinded randomized control trial (RCT) is one in which cases are allocated at random to receive one of several clinical interventions. One of these interventions is the standard of comparison or control. The control may be a standard practice, a placebo, or no intervention at all. RCTs seek to measure and compare the outcomes after the participants receive the interventions. Since the outcomes …
Unblinded, or unrandomized, control trial or experiment (prospective)	As above, but not blinded - i.e. the investigators know which is the experimental and which is the control group.
Prospective cohort study	A cohort study is a quasi-experiment in the form of a longitudinal study (generally a type of observational study). In a cohort study there is a passive follow-up of a group of animals and documentation of relevant characteristics or events related to this group; note that inclusion of information on survival defines a cohort study for our purposes. A cohort study involves an analysis of risk fac…
Prospective case-control study	A case-control study is a type of observational study in which two existing groups differing in outcome (e.g. disease versus no disease) are identified and compared on the basis of some supposed causal attribute (exposure). Case-control studies are often used to identify factors that may contribute to a medical condition by comparing animals that have that condition/disease (the cases) with anima…
Retrospective cohort or case-control study	See above: the study is a cohort or case-control study, but based upon archived records
Cross-sectional study	A cross-sectional study is a type of observational study that involves the analysis of data collected from a population, or a representative subset, at ONE specific point in time — that is, cross-sectional data. Cross-sectional studies differ from case-control studies in that they aim to provide data on the entire population under study, whereas case-control studies typically include only individ…
Retrospective case series or case report	A case series tracks subjects with a known exposure, such as animals that have received a similar treatment, or examines their medical records for exposure and outcome. Case series may be consecutive or non-consecutive, depending on whether all cases presenting to the reporting authors over a time period were included, or only a selection. Case series have a descriptive study design: unlike studi…
Useful resource	http://sphweb.bumc.bu.edu/otlt/MPH-Modules/EP/EP713_Case-Control/EP713_Case-Control8.html

## Sheet: Causality Link
Was causality established?
Definitive	Prospective experimental evidence of causality, which is likely to include mechanistic dissection of immunopathogenesis	3
Supportive	Treatment of infection leads to clinical improvement or remission of MG OR demonstration of immunopathogenic mechanism(s) without prospective experimental interrogation	2
Suggestive	Epidemiological or other inferential (e.g. transcriptomic, immunohistochemical) data	1
No/Absent/Unclear/NA	All other observations	0
